# Supplementary material for: The solvent-free one-pot multicomponent tandem polymerization of 3,4-dihydropyrimidin-2(1H)-ones (DHPMs) catalyzed by ionic-liquid@Fe3O4 NPs: the development of polyamide gels
Source: Royal Society of Chemistry journal article supplement (doi:10.1039/d0py01769h), 2021-01-01
Supplement: d0py01769h1.pdf [file d0py01769h1.pdf]

# Supporting Information

A Solvent-Free One-pot Multicomponent Tandem  
Polymerization of 3,4-Dihydropyrimidin-2(1*H*)-ones  
(DHPMs) Catalyzed by Ionic-Liquid@Fe<sub>3</sub>O<sub>4</sub> NPs:  
Development of Polyamide Gels

Manpreet Kaur,<sup>a</sup> Mayank,<sup>b</sup> Deepak Bains,<sup>b</sup> Gagandeep Singh,<sup>b</sup> Navneet Kaur<sup>\*a</sup> and Narinder  
Singh<sup>\*b</sup>

<sup>a</sup>Department of Chemistry, Panjab University, Chandigarh, India, 160014, E-mail:  
[navneetkaur@pu.ac.in](mailto:navneetkaur@pu.ac.in); Tel: +91-0172-2534405

<sup>b</sup>Department of Chemistry, Indian Institute of Technology Ropar (IIT Ropar), Rupnagar, Punjab,  
140001, India. E-mail: [nsingh@iitrpr.ac.in](mailto:nsingh@iitrpr.ac.in); Tel: +91-1881242176

## Contents

**Procedure S1.** Synthesis of IL1.

**Procedure S2.** Preparation of Iron Oxide Nanoparticles.

**Table S1:** Yield percentage, molecular weight and solubility of synthesized MCTPs P1-P8.

**Figure S1:** GPC traces of synthesized polyamides P1-P8.

**Figure S2:** Mass spectra of Biginelli Product (B1).

**Figure S3: A)** FT-IR spectra of B1 with N-H and C=O stretching vibrations at  $3336.8\text{ cm}^{-1}$  and  $1694.6\text{ cm}^{-1}$  whereas in P1, shifted at  $3473\text{ cm}^{-1}$  and  $1602.6\text{ cm}^{-1}$  respectively. **B)** Comparison of  $^1\text{H}$  NMR spectra of B1 and P1 in  $\text{CDCl}_3/\text{DMSO-}d_6$ .

**Figure S4:** FT-IR spectra of polyamide adducts P2-P8.

**Figure S5: A)**  $^1\text{H}$  NMR Spectra in mixture of  $\text{CDCl}_3$  and  $\text{DMSO-}d_6$  of P1-P4 (Urea derivatives). **B)**  $^1\text{H}$  NMR Spectra in mixture of  $\text{CDCl}_3$  and  $\text{DMSO-}d_6$  of P5-P8 (thiourea derivatives).

**Figure S6: A)**  $^{13}\text{C}$  NMR Spectra in mixture of  $\text{CDCl}_3$  and  $\text{DMSO-}d_6$  of P1-P4 (Urea derivatives). **B)**  $^{13}\text{C}$  NMR Spectra in mixture of  $\text{CDCl}_3$  and  $\text{DMSO-}d_6$  of P5-P8 (thiourea derivatives).

**Figure S7:** Photos of synthesized Polyamide gels (P1-P8).

**Figure S8:** (A) Mass spectrum of IL1 and (B) Mass spectrum of IL-2.

**Figure S9:** (A) FT-IR spectrum of IL1 and (B) FT-IR spectrum of IL-2.

**Figure S10: (A-C)** SEM, TEM and HR-TEM images of  $\text{IL2@Fe}_3\text{O}_4$  NPs respectively. (D-F) SEM, TEM and HR-TEM images of  $\text{IL1@Fe}_3\text{O}_4$  NPs respectively.

**Figure S11: (A-B)** DLS of  $\text{IL1-2@Fe}_3\text{O}_4$ ; **(C-D)** EDX of  $\text{IL1-2@Fe}_3\text{O}_4$ .

**Figure S12:** Solid state UV-Vis absorption spectra of  $\text{Fe}_3\text{O}_4$  NPs, IL1-2 and  $\text{IL1-2@Fe}_3\text{O}_4$ ; **C)** Solid state emission profile IL1 and  $\text{IL1@Fe}_3\text{O}_4$  NPs, IL2 and  $\text{IL1@Fe}_3\text{O}_4$  NPs.

**Figure S13:** A) TGA-Plot of  $\text{Fe}_3\text{O}_4$ ,  $\text{IL1@Fe}_3\text{O}_4$  and  $\text{IL2@Fe}_3\text{O}_4$ . B)  $\text{N}_2$  adsorption isotherm of  $\text{Fe}_3\text{O}_4$ ,  $\text{IL-1@Fe}_3\text{O}_4$  and  $\text{IL-2@Fe}_3\text{O}_4$

**Table S2:**  $\text{N}_2$  adsorption BET measurements of  $\text{Fe}_3\text{O}_4$ ,  $\text{IL-1@Fe}_3\text{O}_4$  and  $\text{IL-2@Fe}_3\text{O}_4$

**Table S3:** Acidic strength calculation for  $\text{Fe}_3\text{O}_4$ ,  $\text{IL-1@Fe}_3\text{O}_4$  and  $\text{IL-2@Fe}_3\text{O}_4$

**Figure S14: A-B)** SEM and DLS images of  $\text{IL2@Fe}_3\text{O}_4$  after the fifth recycling cycle, respectively; **C-D)** SEM and DLS images of  $\text{IL2@Fe}_3\text{O}_4$  after the tenth recycling cycle, respectively.

**Table S4:** Physical Properties and Efficiency of Recovered  $\text{IL2@Fe}_3\text{O}_4$  NPs catalyst.

**Procedure S1. Synthesis of IL1:** IL1 was synthesized by using reported procedure.<sup>1</sup> Dissolved 1 eq of 1-methyl imidazole in acetonitrile solvent and then added 1eq of bromoacetic acid and refluxed the reaction mixture at  $80^\circ\text{C}$  for 6 hours. Pale yellow colored crystalline solid was separated after evaporation of the solvent on reduced pressure. Yield 74% and purity was characterized by IR (KBr thin film),  $\nu(\text{cm}^{-1})$ : 3378.66 (broad), 3092.63, 3040.17, 1719.50, 1666.89, 1565.97, 1366.71, 1174.45, 1044.71, 771.36, 648.85, 455.78. ESI-MS  $m/z = 141.07$  [ $\text{M} + \text{H}$ ]<sup>+</sup>.

**Procedure S2. Preparation of Iron Oxide Nanoparticles:** The iron oxide nanoparticles were prepared by using reported procedure.<sup>2</sup> Dissolved  $\text{FeSO}_4 \cdot 7\text{H}_2\text{O}$  in 100 ml of double distilled water to form a 0.1 M solution and dropwise added 0.45 M solution of NaOH as precipitating agent with continuous stirring. The black precipitates separated out after 45 min stirring. Filtered the precipitates and washed with water/ethanol mixture for 3 to 4 times.

**Table S1:** MCTPs of poly(DHPMs) (P1-P8).

| Entry | Poly(DHPMs) | Yield (%) | $M_w^a$ (g/mol) | PDI <sup>a</sup> | Solubility <sup>b</sup> |
|-------|-------------|-----------|-----------------|------------------|-------------------------|
| 1.    | P1          | 75        | 41,712          | 1.67             | ✓                       |
| 2.    | P2          | 70        | 37,315          | 1.20             | ✓                       |
| 3.    | P3          | 74        | 18,525          | 1.36             | ✓                       |
| 4.    | P4          | 80        | 83,384          | 1.78             | ✓                       |

|    |    |    |        |      |   |
|----|----|----|--------|------|---|
| 5. | P5 | 74 | 17,332 | 1.52 | ✓ |
| 6. | P6 | 70 | 11,427 | 1.75 | ✓ |
| 7. | P7 | 68 | 13,375 | 1.27 | ✓ |
| 8. | P8 | 75 | 35,860 | 1.65 | ✓ |

<sup>a</sup>Evaluated by GPC at room temperature in THF solvent and calibrated by linear polystyrene.

<sup>b</sup>Solubility tested in organic solvents, such as Metanol, THF, DMSO, DMF and Acetonitrile:

✓ = Completely soluble.

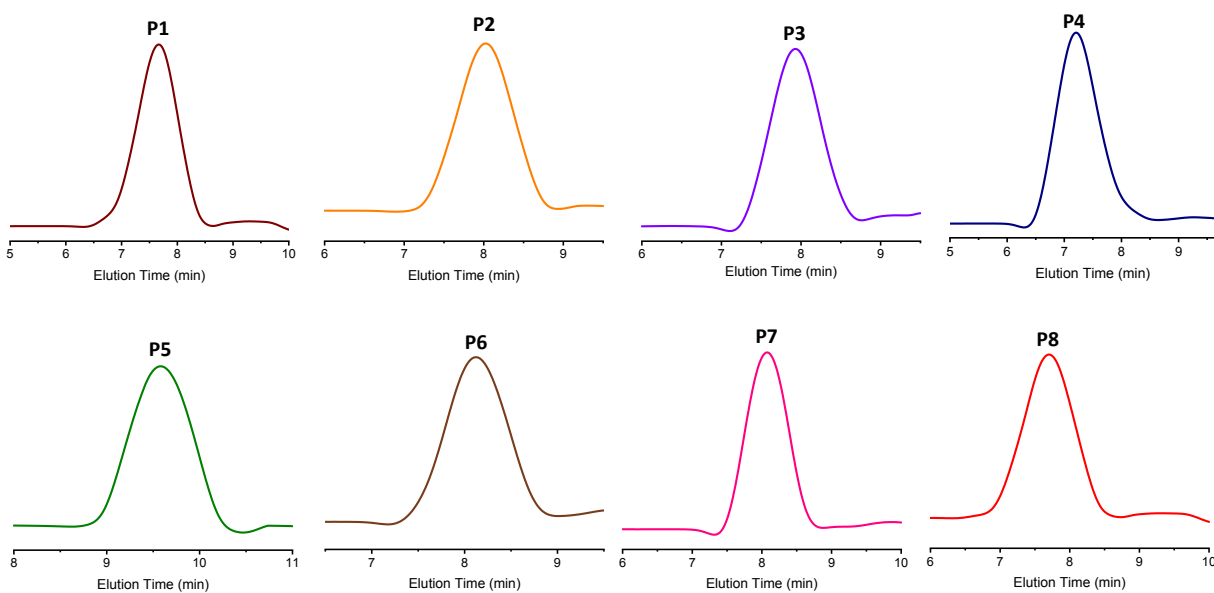

**Figure S1.** GPC traces of synthesized polyamides P1-P8.

Monoisotopic Mass, Odd and Even Electron Ions  
 25 formula(e) evaluated with 1 results within limits (up to 50 best isotopic matches for each mass)

Elements Used:

C: 10-25 H: 10-30 N: 0-4 O: 0-6

Sample Name : MR-19

INDIAN INSTITUTE OF TECHNOLOGY

XEVO G2-XS QTOF

Test Name : HRMS

ROPAR

170717-MR-19 19 (0.214) AM2 (Ar,18000.0,0.00,0.00); Cm (19:28)

1: TOF MS ES+

4.15e+006

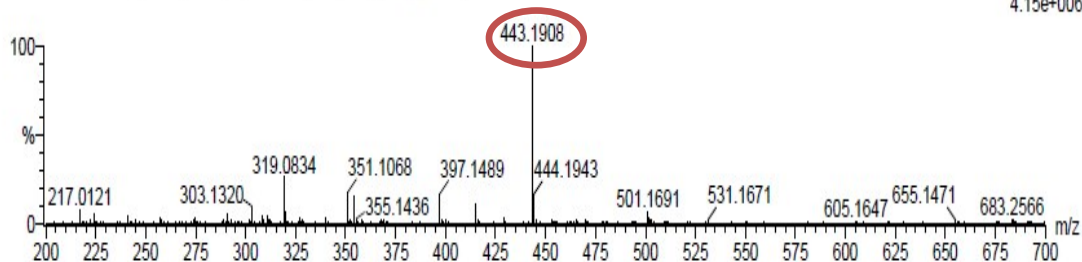

Minimum: -1.5  
 Maximum: 5.0 20.0 50.0

| Mass     | Calc. Mass | mDa  | PPM  | DBE  | i-FIT | Norm | Conf(%) | Formula       |
|----------|------------|------|------|------|-------|------|---------|---------------|
| 443.1908 | 443.1931   | -2.3 | -5.2 | 11.5 | 448.2 | n/a  | n/a     | C22 H27 N4 O6 |

**Figure S2.** Mass spectra of Biginelli Product (B1).

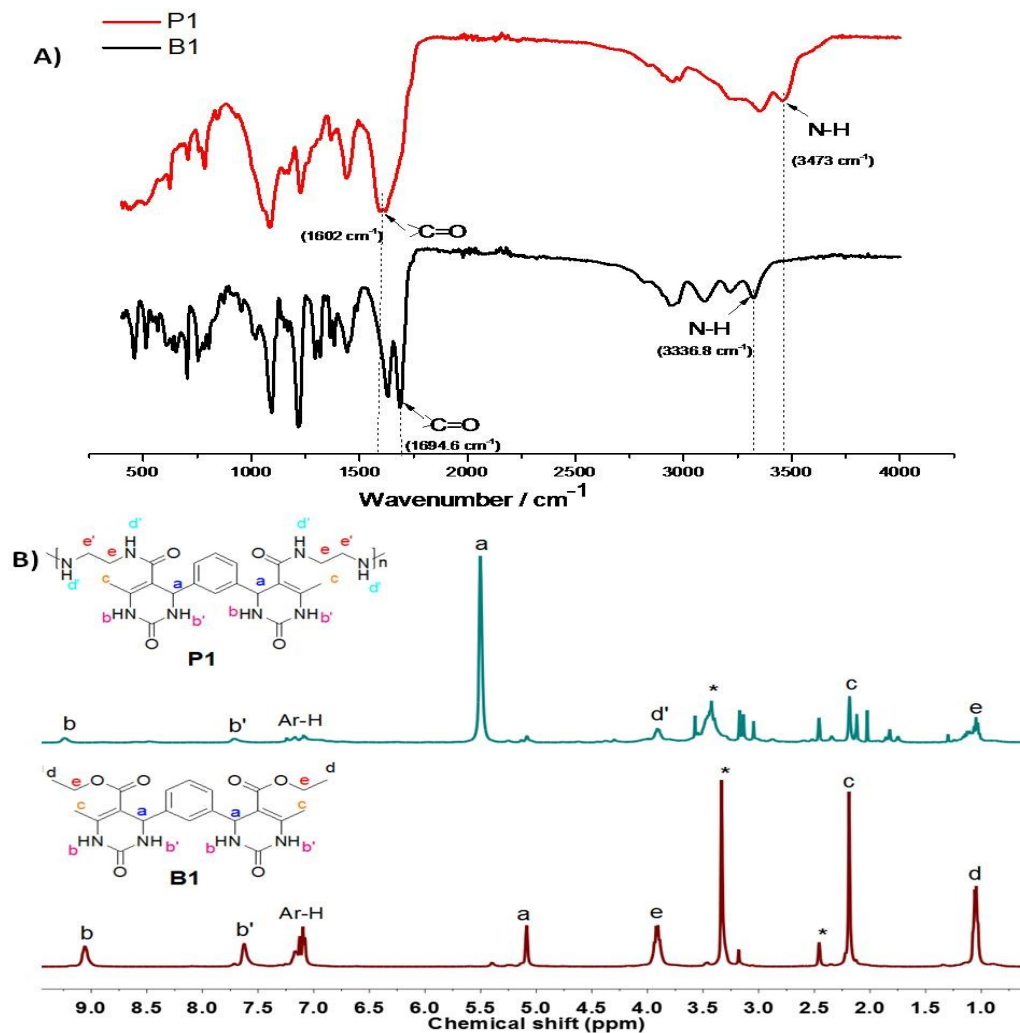

**Figure S3:** **A)** FT-IR spectra of B1 with N-H and C=O stretching vibrations at  $3336.8 \text{ cm}^{-1}$  and  $1694.6 \text{ cm}^{-1}$  whereas in P1, shifted at  $3473 \text{ cm}^{-1}$  and  $1602.6 \text{ cm}^{-1}$  respectively. **B)** Comparison of  $^1\text{H}$  NMR spectra of B1 and P1 in  $\text{CDCl}_3/\text{DMSO-}d_6$ .

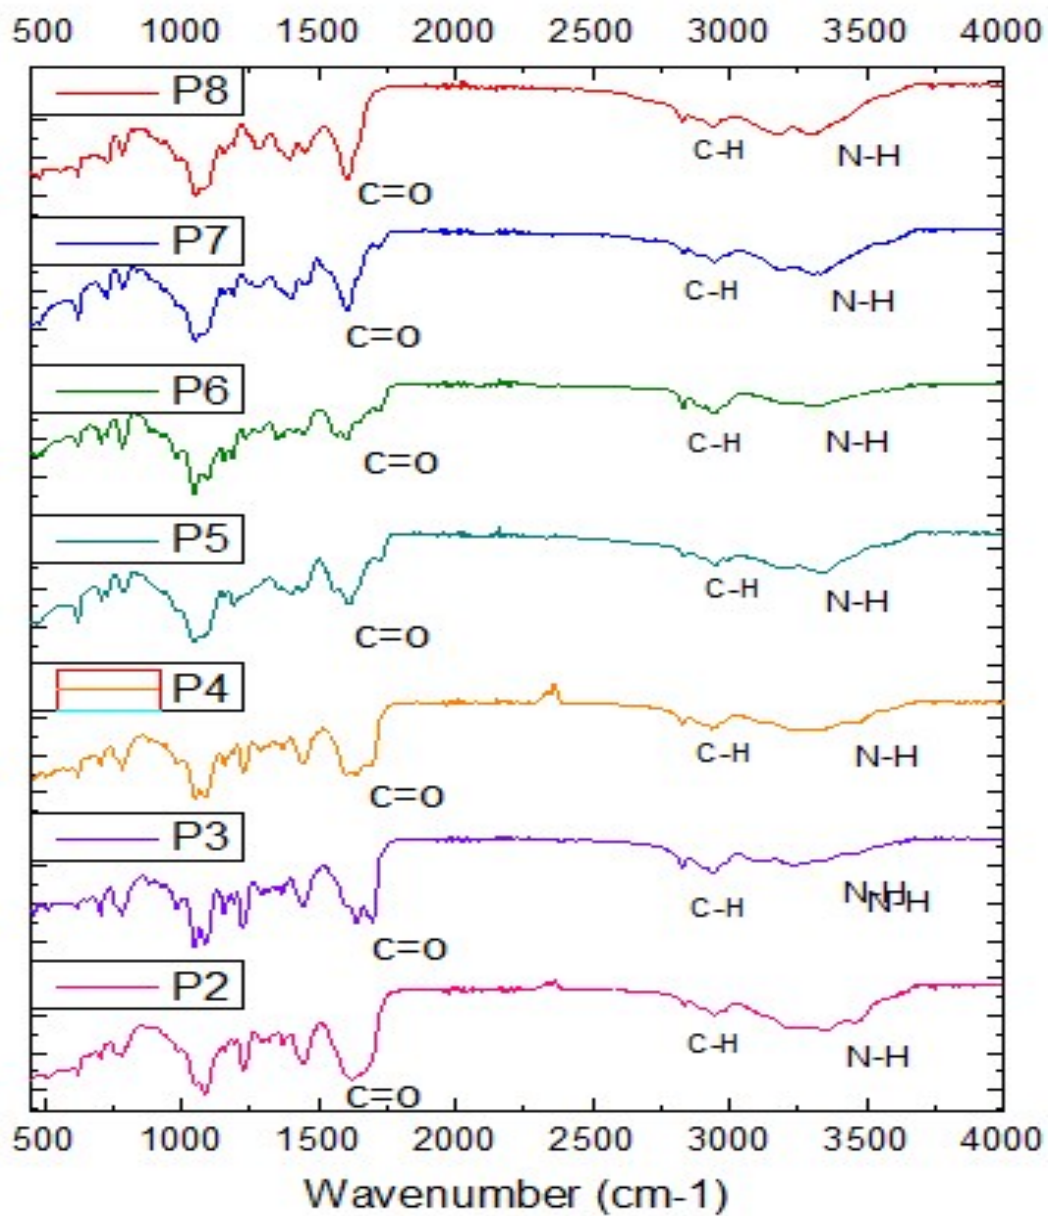

**Figure S4.** FT-IR spectra of polyamide adducts P2-P8.

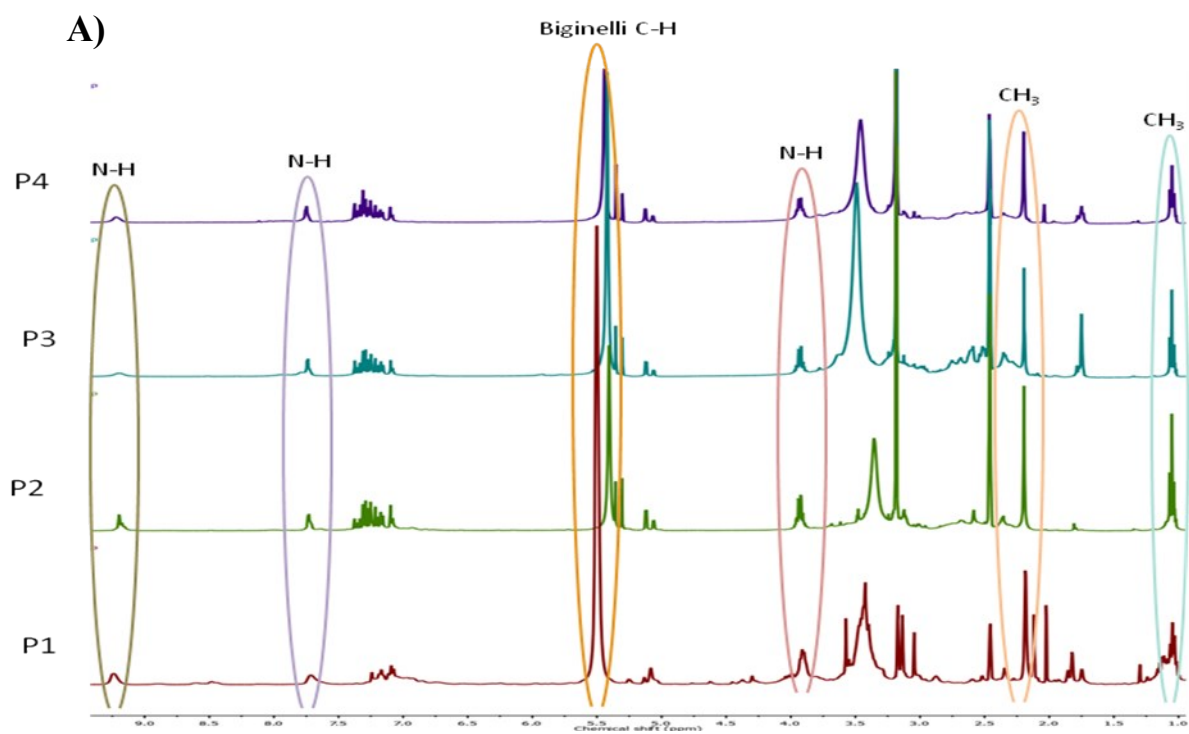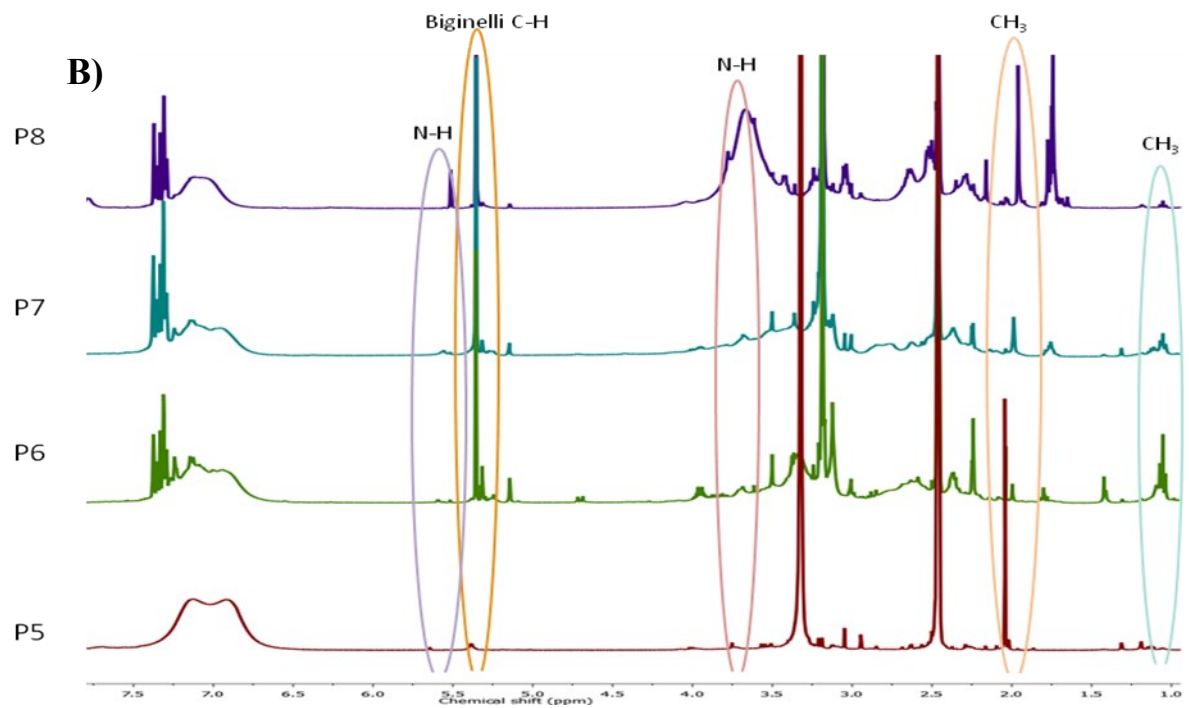

**Figure S5.:** A)  $^1\text{H}$  NMR spectra in mixture of  $\text{CDCl}_3$  and  $\text{DMSO-}d_6$  of P1-P4 (Urea derivatives). B)  $^1\text{H}$  NMR spectra in mixture of  $\text{CDCl}_3$  and  $\text{DMSO-}d_6$  of P5-P8 (thiourea derivatives).



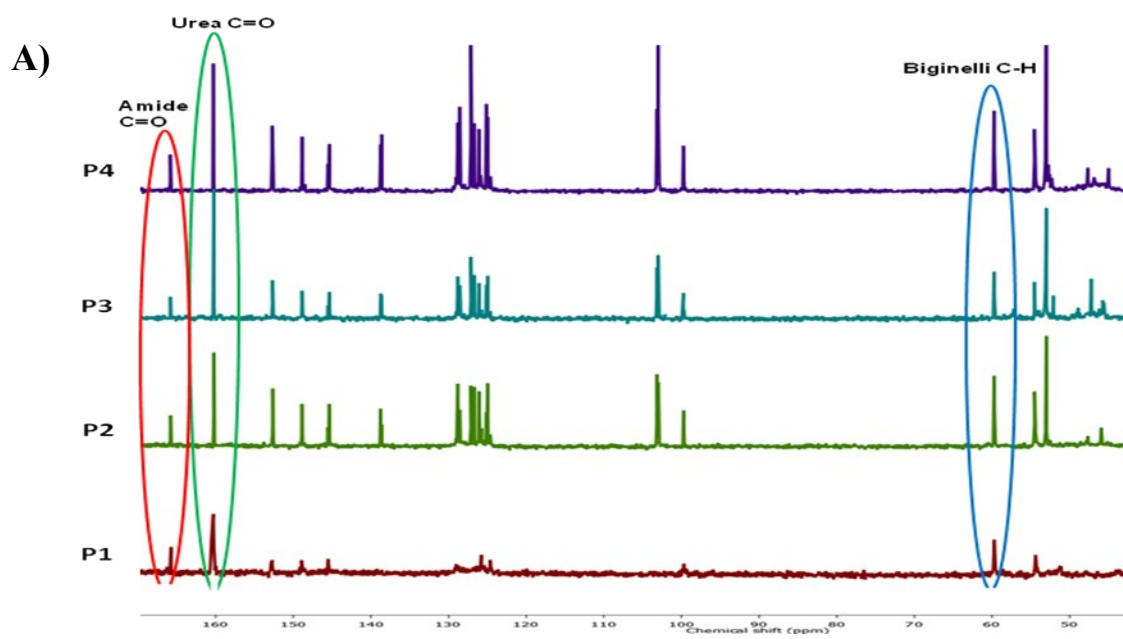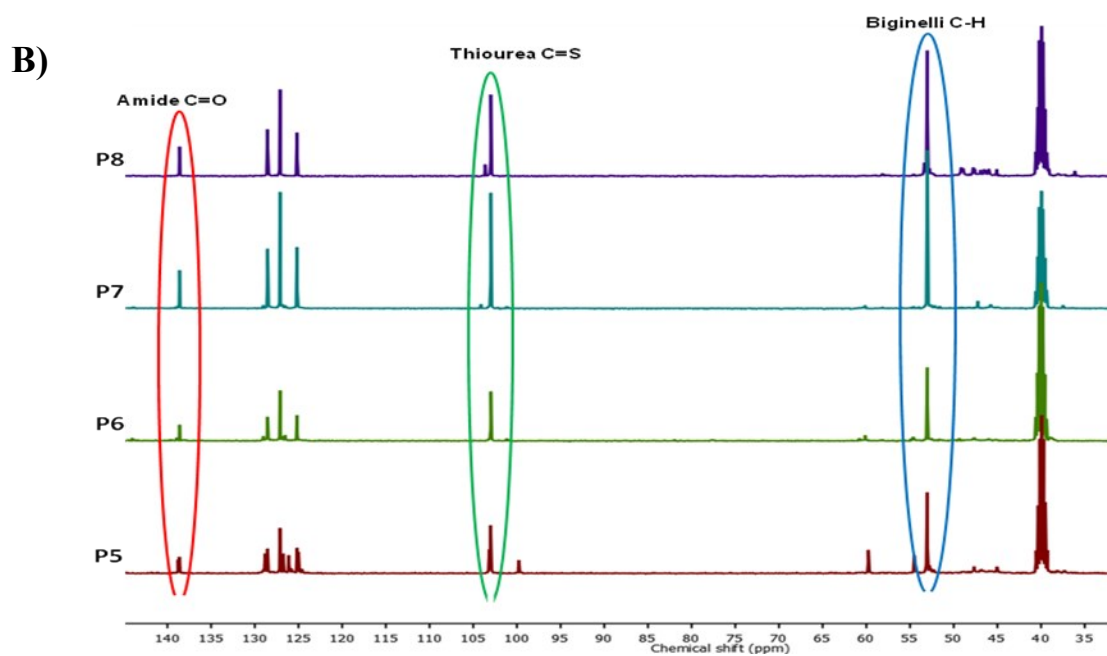

**Figure S6. A)**  $^{13}\text{C}$  NMR spectra in mixture of  $\text{CDCl}_3$  and  $\text{DMSO-}d_6$  of P1-P4 (Urea derivatives). **B)**  $^{13}\text{C}$ -NMR spectra in mixture of  $\text{CDCl}_3$  and  $\text{DMSO-}d_6$  of P5-P8 (thiourea derivatives).

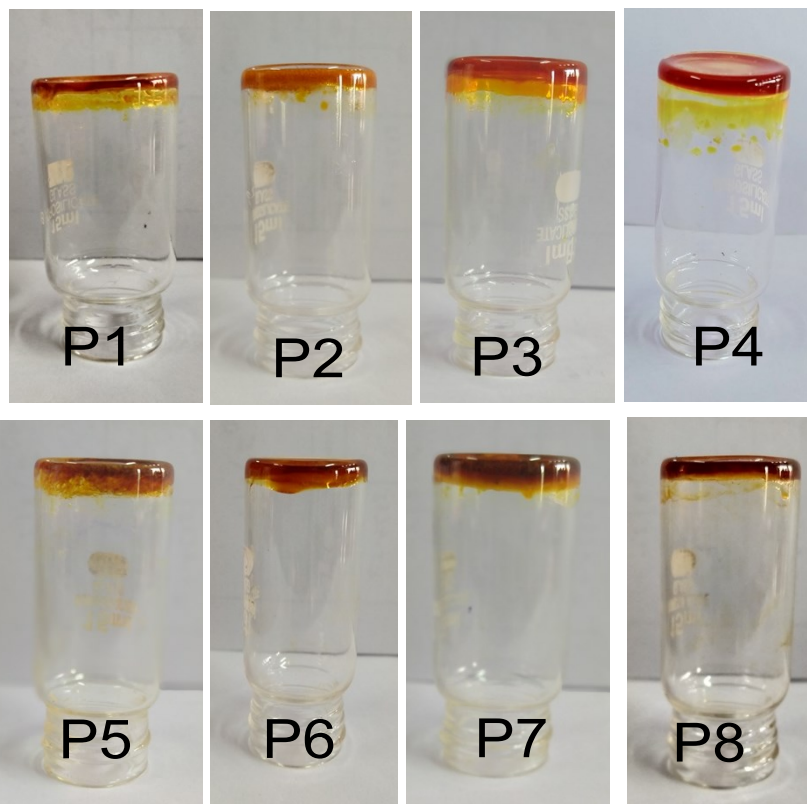

Figure S7: Photographs of Synthesized polyamide gels (P1-P8).

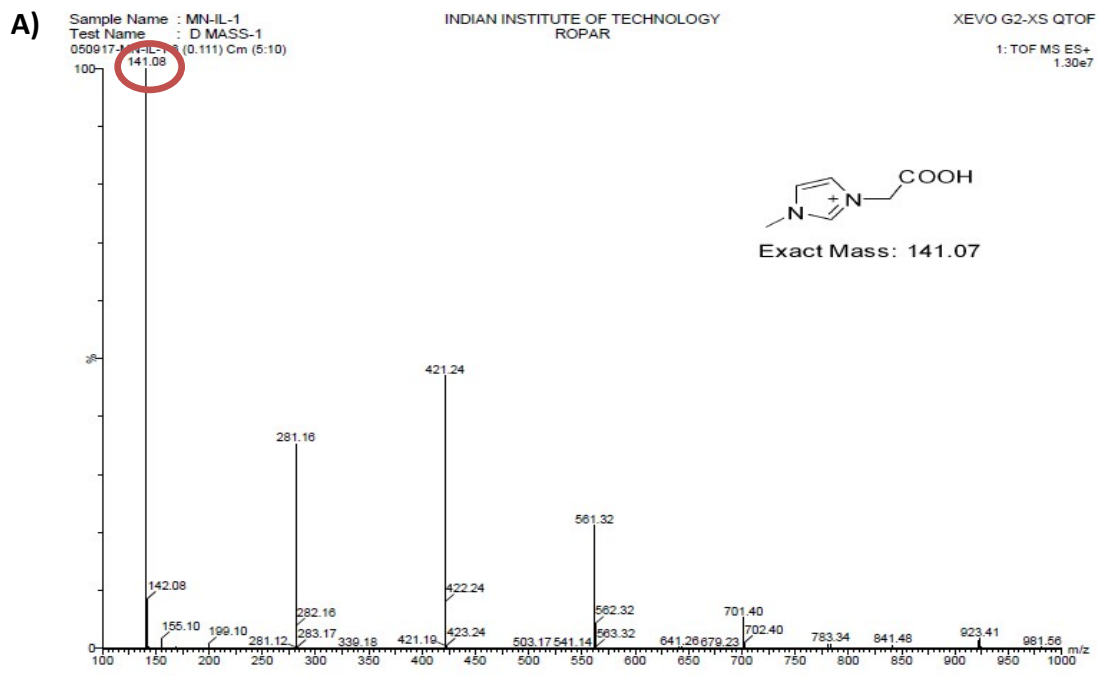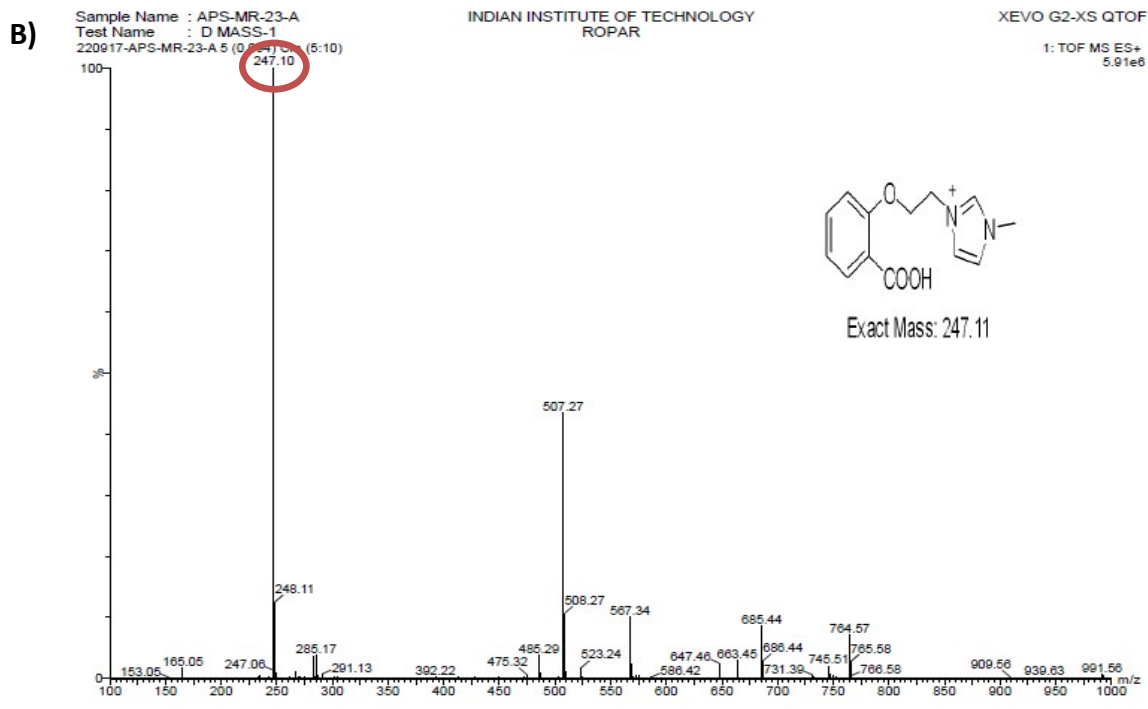

**Figure S8.** (A) Mass spectrum of IL1 and (B) Mass spectrum of IL-2.

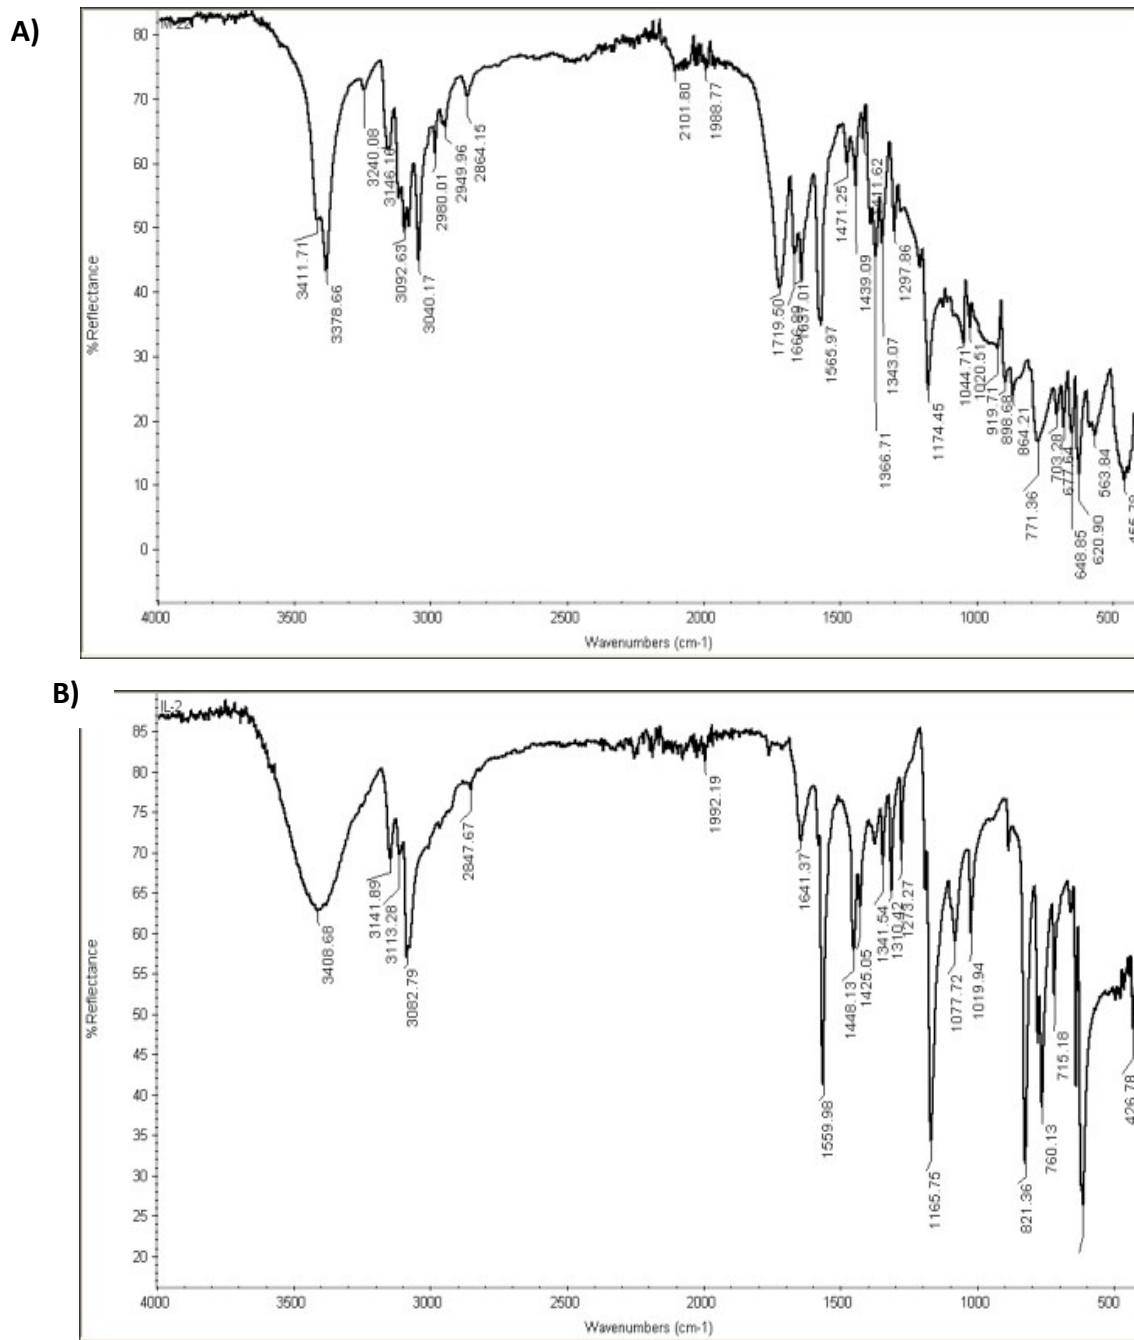

**Figure S9.** (A) FT-IR spectrum of IL1 and (B) FT-IR spectrum of IL-2.

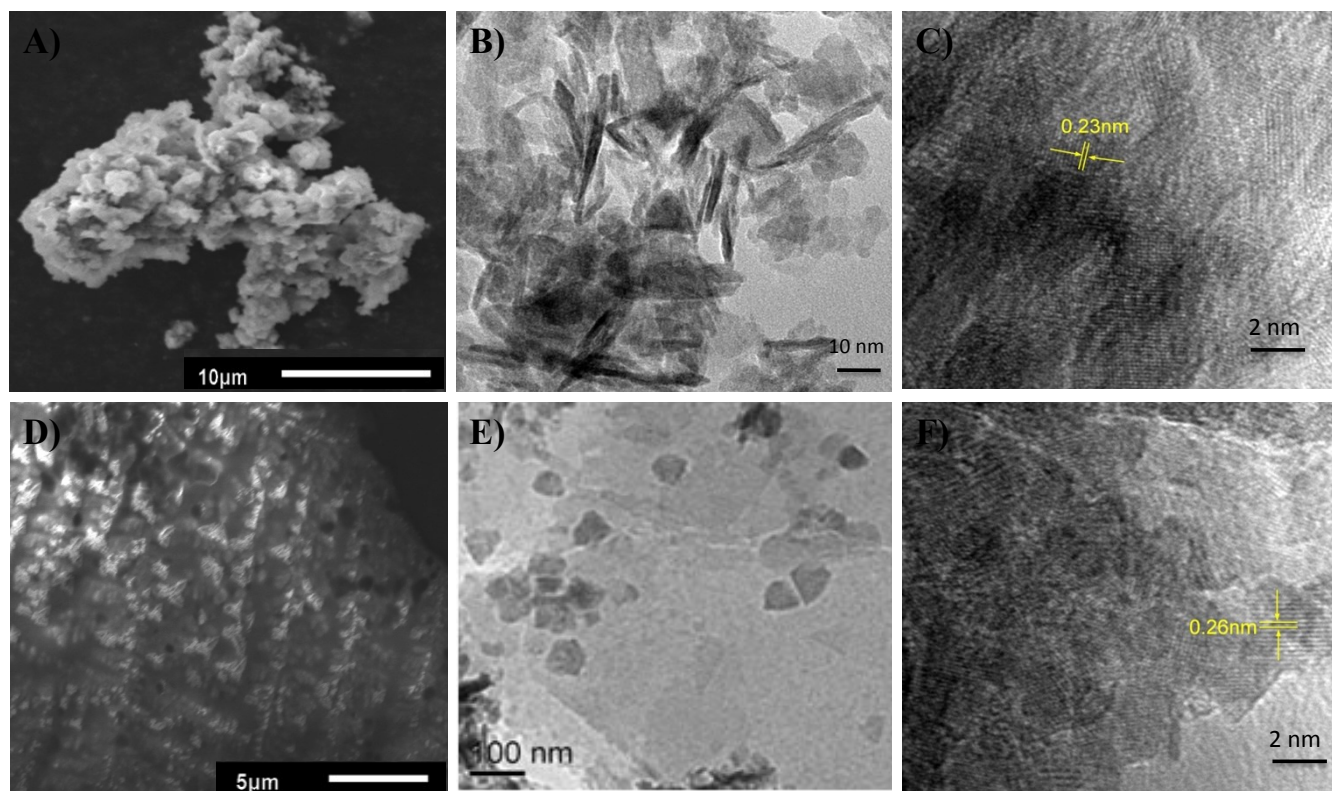

**Figure S10:** (A-C) SEM, TEM and HR-TEM images of IL2@Fe<sub>3</sub>O<sub>4</sub> NPs respectively. (D-F) SEM, TEM and HR-TEM images of IL1@ Fe<sub>3</sub>O<sub>4</sub> NPs respectively.

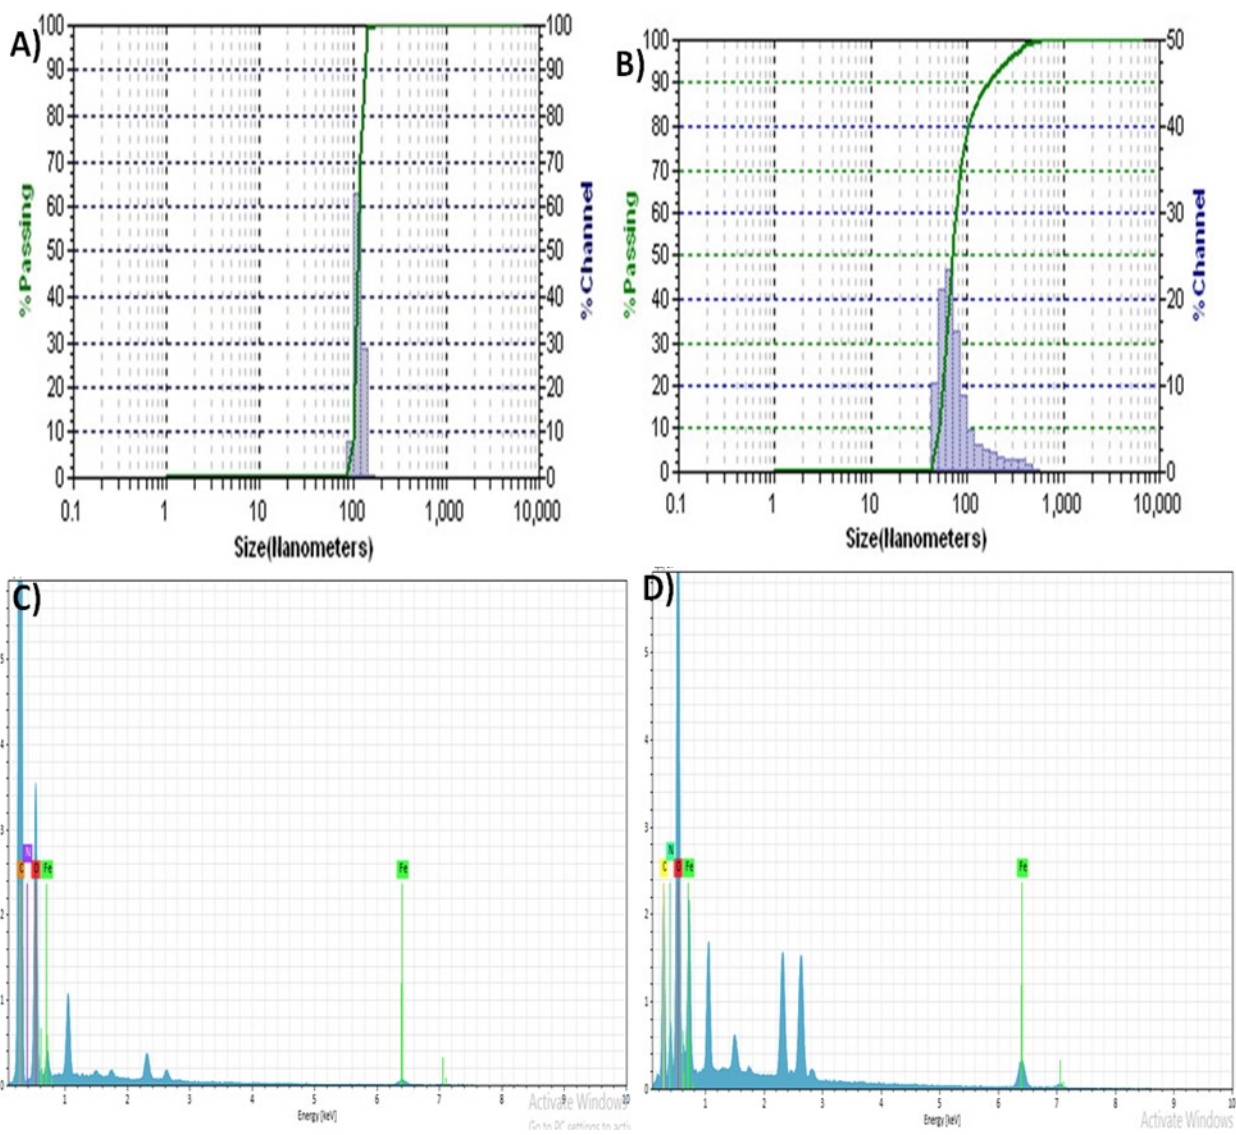

**Figure S11. A-B) DLS of IL1-2@Fe<sub>3</sub>O<sub>4</sub>; C-D) EDX of IL1-2@Fe<sub>3</sub>O<sub>4</sub>.**



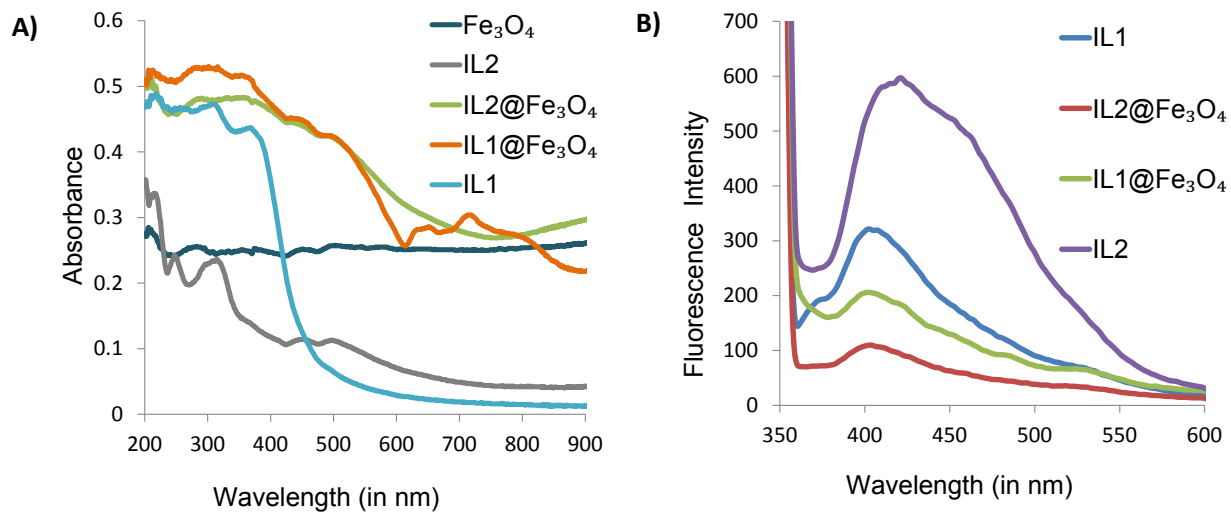

**Figure S12:** A) Solid state UV-Vis absorption spectra of Fe<sub>3</sub>O<sub>4</sub> NPs, IL1-2 and IL1-2@Fe<sub>3</sub>O<sub>4</sub>; B) Solid state emission profile IL1 and IL1@Fe<sub>3</sub>O<sub>4</sub>NPs, IL2 and IL1@Fe<sub>3</sub>O<sub>4</sub>NPs.

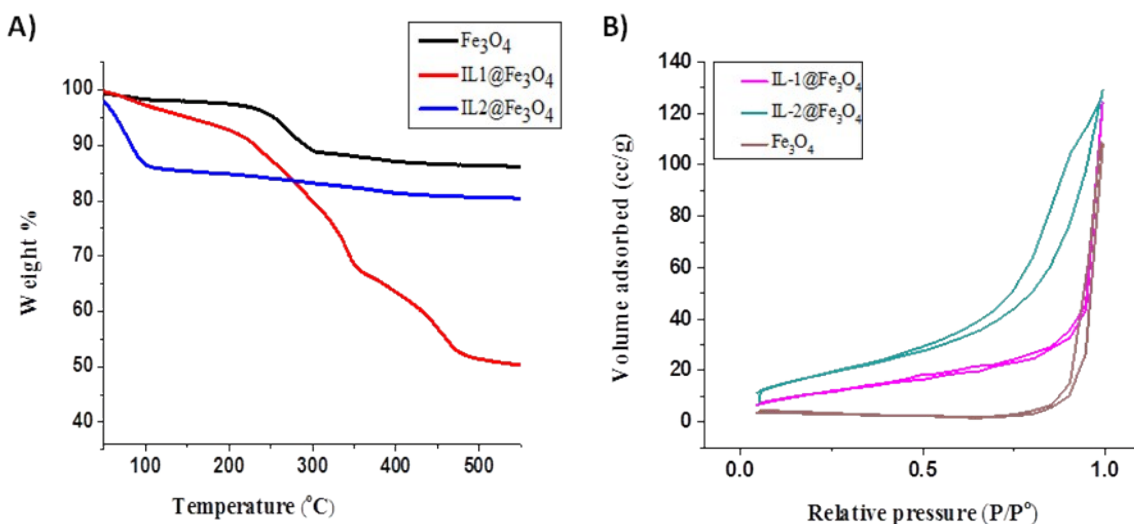

**Figure S13.** A) TGA-Plot of Fe<sub>3</sub>O<sub>4</sub>, IL1@Fe<sub>3</sub>O<sub>4</sub> and IL2@Fe<sub>3</sub>O<sub>4</sub>. B) N<sub>2</sub> adsorption isotherm of Fe<sub>3</sub>O<sub>4</sub>, IL-1@Fe<sub>3</sub>O<sub>4</sub> and IL-2@Fe<sub>3</sub>O<sub>4</sub>.

**Table S2:** N<sub>2</sub> adsorption BET measurements of Fe<sub>3</sub>O<sub>4</sub>, IL-1@Fe<sub>3</sub>O<sub>4</sub> and IL-2@Fe<sub>3</sub>O<sub>4</sub>

| S. No. | Catalyst                            | Surface area (m <sup>2</sup> g <sup>-1</sup> ) | Pore volume (cm <sup>3</sup> g <sup>-1</sup> ) | Average pore diameter (nm) |
|--------|-------------------------------------|------------------------------------------------|------------------------------------------------|----------------------------|
| 1.     | Fe <sub>3</sub> O <sub>4</sub>      | 18.00                                          | 0.181                                          | 32.55                      |
| 2.     | IL-1@Fe <sub>3</sub> O <sub>4</sub> | 57.57                                          | 0.198                                          | 3.77                       |
| 3.     | IL-2@Fe <sub>3</sub> O <sub>4</sub> | 90.63                                          | 0.209                                          | 9.54                       |

**Table S3:** Acidic strength calculation for Fe<sub>3</sub>O<sub>4</sub>, IL-1@Fe<sub>3</sub>O<sub>4</sub> and IL-2@Fe<sub>3</sub>O<sub>4</sub>

| Sr.No | Catalyst                           | Volume of 0.5 N HCl <sup>a</sup> (ml) | Basic unit count <sup>b</sup> (BU) (mmol/g) | (RBA) <sup>c</sup> (mmol/g) | Relative basic units <sup>d</sup> (RBA/0.25) |
|-------|------------------------------------|---------------------------------------|---------------------------------------------|-----------------------------|----------------------------------------------|
| 1.    | Fe <sub>3</sub> O <sub>4</sub>     | 0.5                                   | 0.25                                        | 0.25                        | 1                                            |
| 2.    | IL1@Fe <sub>3</sub> O <sub>4</sub> | 0.4                                   | 0.2                                         | 0.63                        | 2.55                                         |
| 3.    | IL2@Fe <sub>3</sub> O <sub>4</sub> | 0.7                                   | 0.35                                        | 1.76                        | 7.04                                         |

<sup>a</sup>Volume of 0.5 N HCl required to neutralize 1 mg of catalyst (ml) calculated via back titration; <sup>b</sup>Number of unit's equivalent to "OH" present in 1 mg of sample; <sup>c</sup>Relative SA based exposure of BU to reactants, calculated using the formula: BU × SA of catalyst/SA of Fe<sub>3</sub>O<sub>4</sub> (SAs from Table 3); <sup>d</sup>Calculated using the formula: RBA×RBU/RBU for Fe<sub>3</sub>O<sub>4</sub>.



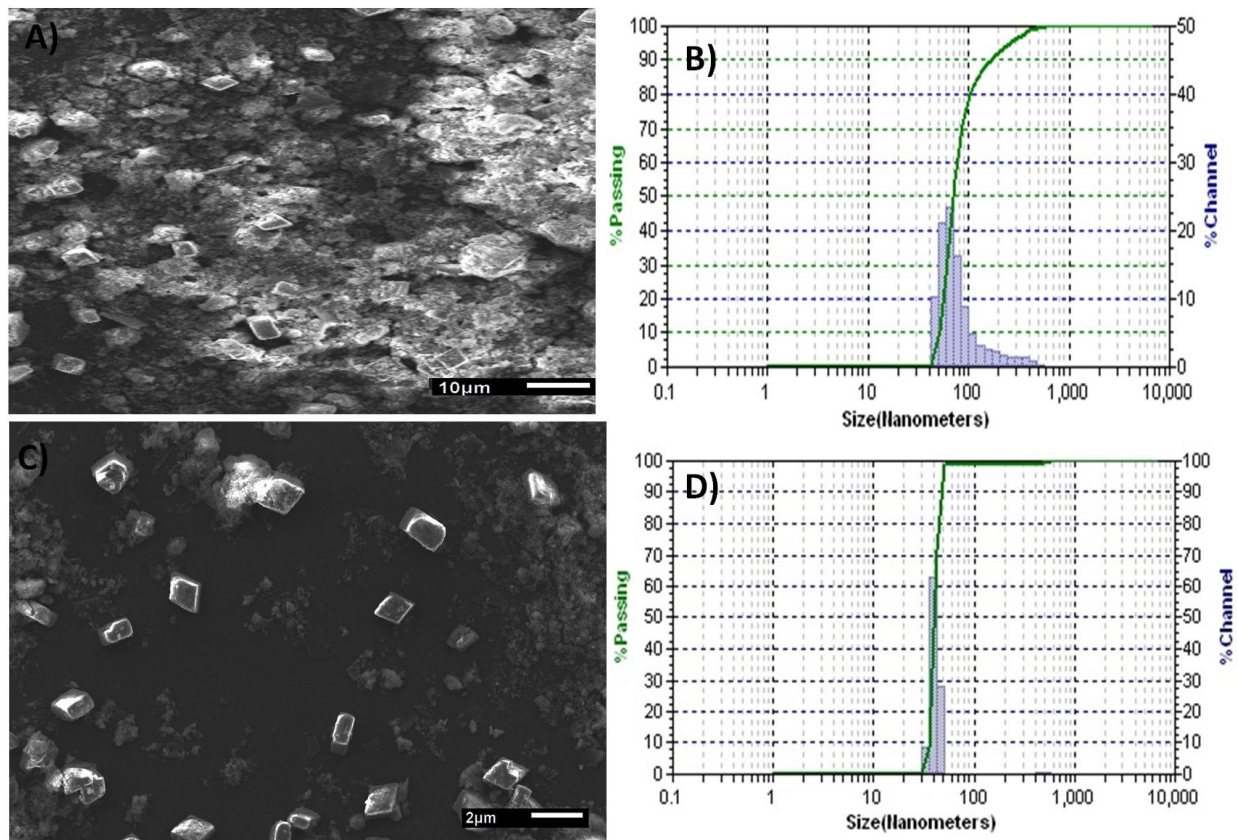

**Figure S14:** A-B) SEM and DLS images of IL2@ Fe<sub>3</sub>O<sub>4</sub> after the fifth recycling cycle, respectively; C-D) SEM and DLS images of IL2@ Fe<sub>3</sub>O<sub>4</sub> after the tenth recycling cycle, respectively.

**Table S4:** Physical Properties and Efficiency of Recovered IL2@Fe<sub>3</sub>O<sub>4</sub> NPs catalyst.

| Entry | Catalyst                                        | Size (nm) <sup>a</sup> | (%) Yield of P1 |
|-------|-------------------------------------------------|------------------------|-----------------|
| 1.    | IL2@Fe <sub>3</sub> O <sub>4</sub> <sup>b</sup> | 67                     | 91              |
| 2.    | IL2@Fe <sub>3</sub> O <sub>4</sub> <sup>c</sup> | 49                     | 84              |

<sup>a</sup>Measured by DLS. IL2@Fe<sub>3</sub>O<sub>4</sub> recovered after <sup>b</sup>fifth and <sup>c</sup>tenth catalytic reaction cycle.

## REFERENCES

1. Mayank, A. Singh, P. Raj, R. Kaur, A. Singh, N. Kaur and N. Singh, *New J. Chem.*, **2017**, 41, 3872-3881.
2. D. D. Suppiah and S. B. A. Hamid, *J. Magn. Magn. Mater.*, **2016**, 414, 204-208.
